# Human Als3p Antibodies are Surrogate Markers of NDV-3A Vaccine Efficacy Against Recurrent Vulvovaginal Candidiasis

Priya Uppuluri<sup>1,2</sup>, Shakti Singh<sup>2</sup>, Abdullah Alqarihi<sup>2</sup>, Clint S. Schmidt<sup>3</sup>, John P. Hennessey<sup>3</sup>, Michael R. Yeaman<sup>1,2</sup>, Scott G. Filler<sup>1,2</sup>, John E. Edwards<sup>1,2</sup>, Ashraf S. Ibrahim<sup>1,2\*</sup>

<sup>1</sup>UCLA David Geffen School of Medicine, United States, <sup>2</sup>Los Angeles Biomedical Research Institute, United States, <sup>3</sup>NovaDigm Therapeutics (United States), United States

*Submitted to Journal:*  
Frontiers in Immunology

*Specialty Section:*  
Vaccines and Molecular Therapeutics

*Article type:*  
Original Research Article

*Manuscript ID:*  
357123

*Received on:*  
30 Jan 2018

*Revised on:*  
03 May 2018

*Frontiers website link:*  
[www.frontiersin.org](http://www.frontiersin.org)

### *Conflict of interest statement*

The authors declare a potential conflict of interest and state it below

CS and JH are employees and shareholders of NovaDigm Therapeutics. MY, SF, JE, and AI are founders and shareholders of NovaDigm Therapeutics. All other co-authors have no formal association with NovaDigm.

### *Author contribution statement*

PU designed, performed, supervised the project and wrote the manuscript. SS performed experiments, designed the ROC, analyzed the data and revised the manuscript. AA performed the experiments and analyzed the data, CS provided materials and revised the manuscript. JH, provided materials and revised the manuscript, MY revised the manuscript, SF contributed to the study design and revised the manuscript. JE contributed to the study design and revised the manuscript. AI designed and supervised the project and wrote the manuscript.

### *Keywords*

Candida albicans, RVVC, Als3p, Vaccine, Virulence, NDV-3, NDV-3A

### *Abstract*

Word count: 234

A Phase 1b/2a clinical trial of NDV-3A vaccine containing a *Candida albicans* recombinant Als3 protein protected women <40 years old from recurrent vulvovaginal candidiasis (RVVC). We investigated the potential use of anti-Als3p sera as surrogate marker of NDV-3A efficacy. Pre- and post-vaccination sera from subjects who experienced recurrence of VVC (R) versus those who were recurrence-free (non-recurrent, NR) were evaluated. Anti-Als3p antisera obtained were evaluated for: 1) titer and subclass profile; 2) their ability to influence *C. albicans* virulence traits including hyphal elongation, adherence to plastic, invasion of vaginal epithelial cells, biofilm formation on plastic and catheter material, and susceptibility to neutrophil killing in vitro. Serum IgG titers in NR patients were consistently higher than in R patients, particularly for anti-Als3 subclass IgG2. Sera from vaccinated NR patients reduced hyphal elongation, adhesion to plastic, invasion of vaginal epithelial cells and biofilm formation significantly more than pre-immune sera, or sera from R- or placebo-group subjects. Pre-adsorption of sera with *C. albicans* germ tubes eliminated these effects, while heat inactivation did not. Finally, sera from NR subjects enhanced neutrophil-mediated killing of *C. albicans* relative to pre-immune sera or sera from R patients. Our results suggest that higher Als3p antibody titers are associated with protection from RVVC, attenuate *C. albicans* virulence and augment immune clearance of the fungus in vitro. Thus, Als3p serum IgG antibodies are likely useful markers of efficacy in RVVC patients vaccinated with NDV-3A.

### *Funding statement*

This work was supported by NIH grant R01 AI063382 to JE, DOD grant W81XWH-11-1-0686 to JH, American Heart Association 16SDG30830012 to PU and by NovaDigm Therapeutics.

### *Ethics statements*

(Authors are required to state the ethical considerations of their study in the manuscript, including for cases where the study was exempt from ethical approval procedures)

Does the study presented in the manuscript involve human or animal subjects: Yes

Please provide the complete ethics statement for your manuscript. Note that the statement will be directly added to the manuscript file for peer-review, and should include the following information:

- Full name of the ethics committee that approved the study
- Consent procedure used for human participants or for animal owners
- Any additional considerations of the study in cases where vulnerable populations were involved, for example minors, persons with disabilities or endangered animal species

*As per the Frontiers authors guidelines, you are required to use the following format for statements involving human subjects: This study was carried out in accordance with the recommendations of [name of guidelines], [name of committee]. The protocol was approved by the [name of committee]. All subjects gave written informed consent in accordance with the Declaration of Helsinki.*

*For statements involving animal subjects, please use:*

*This study was carried out in accordance with the recommendations of 'name of guidelines, name of committee'. The protocol was approved by the 'name of committee'.*

*If the study was exempt from one or more of the above requirements, please provide a statement with the reason for the exemption(s).*

*Ensure that your statement is phrased in a complete way, with clear and concise sentences.*

This study was carried out in accordance with the recommendations of National Institutes of Health guidelines for human subject policies and ethical guidance and regulations with written informed consent from all subjects. All subjects gave written informed consent in accordance with the Declaration of Helsinki. The protocol was approved by the 'Los Angeles Biomedical Research Institute IRB'.

In review

# Human Als3p Antibodies are Surrogate Markers of NDV-3A Vaccine Efficacy Against Recurrent Vulvovaginal Candidiasis

Priya Uppuluri<sup>1,2</sup>, Shakti Singh<sup>1</sup>, Abdullah Alqarihi<sup>1</sup>, Clint S. Schmidt<sup>3</sup>,

John P. Hennessey, Jr.<sup>3</sup>, Michael R. Yeaman<sup>1,2</sup>, Scott G. Filler<sup>1,2</sup>, John E. Edwards<sup>1,2</sup>

and Ashraf S. Ibrahim\*<sup>1,2</sup>

<sup>1</sup>Los Angeles Biomedical Research Institute at Harbor-University of California at Los Angeles (UCLA) Medical Center, Torrance, California, USA; <sup>2</sup>David Geffen School of Medicine at University of California, Los Angeles, CA; <sup>3</sup>NovaDigm Therapeutics, Brookline, Massachusetts, USA

Word count: 3,472

Running title: Anti-Als3p antibodies and NDV-3A vaccine efficacy

\*Corresponding author: Ashraf S. Ibrahim PhD, Los Angeles Biomedical Research Institute, Division of Infectious Diseases, Harbor-UCLA Medical Center, 1124 West Carson St., St. John's Cardiovascular Research Center, Torrance, CA 90502. Phone 310-222-6424, Fax 310-782-2016; [ibrahim@labiomed.org](mailto:ibrahim@labiomed.org).

27 **Abstract**

28

29 A Phase 1b/2a clinical trial of NDV-3A vaccine containing a *Candida albicans* recombinant Als3  
30 protein protected women <40 years old from recurrent vulvovaginal candidiasis (RVVC). We  
31 investigated the potential use of anti-Als3p sera as surrogate marker of NDV-3A efficacy. Pre- and  
32 post-vaccination sera from subjects who experienced recurrence of VVC (R) versus those who  
33 were recurrence-free (non-recurrent, NR) were evaluated. Anti-Als3p antisera obtained were  
34 evaluated for; 1) titer and subclass profile; 2) their ability to influence *C. albicans* virulence traits  
35 including hyphal elongation, adherence to plastic, invasion of vaginal epithelial cells, biofilm  
36 formation on plastic and catheter material, and susceptibility to neutrophil killing *in vitro*. Serum  
37 IgG titers in NR patients were consistently higher than in R patients, particularly for anti-Als3  
38 subclass IgG2. Sera from vaccinated NR patients reduced hyphal elongation, adhesion to plastic,  
39 invasion of vaginal epithelial cells and biofilm formation significantly more than pre-immune sera,  
40 or sera from R- or placebo-group subjects. Pre-adsorption of sera with *C. albicans* germ tubes  
41 eliminated these effects, while heat inactivation did not. Finally, sera from NR subjects enhanced  
42 neutrophil-mediated killing of *C. albicans* relative to pre-immune sera or sera from R patients. Our  
43 results suggest that higher Als3p antibody titers are associated with protection from RVVC,  
44 attenuate *C. albicans* virulence and augment immune clearance of the fungus *in vitro*. Thus, Als3p  
45 serum IgG antibodies are likely useful markers of efficacy in RVVC patients vaccinated with  
46 NDV-3A.

47

48

49

50

51 **Keywords:** *Candida albicans*, RVVC, Als3p, vaccine, virulence, NDV-3, NDV-3A

52

53 **Abbreviations:** Als3p, Agglutinin-like sequence 3 protein; AUC, area under the curve; CFU,  
54 colony forming unit; ConA, Concanavalin A; ELISA, enzyme-linked immunosorbent assay;  
55 Hyr1p, hyphal regulating protein 1; IRB, institutional review board; OPK, opsonophagocytic  
56 killing; NR, non-recurrent; NDV-3, recombinant His-tagged N-terminus of Als3p R formulated  
57 with alum; NDV-3A, recombinant N-terminus of Als3p R formulated with alum recurrent;  
58 RVVC, recurrent vulvovaginal candidiasis; ROC, Receiver-operating characteristic; Sap2,  
59 secreted aspartyl proteinase 2; SE, silicone elastomer; VVC, vulvovaginal candidiasis; YNB,  
60 yeast nitrogen base; YPD, yeast peptone dextrose.

In review

## 61 INTRODUCTION

62  
63 *Candida* species cause distressing mucocutaneous infections of the integument, oral and  
64 genitourinary tracts. Vulvovaginal candidiasis is estimated to occur in 50–75% of women in their  
65 childbearing years (1-3) and recurrence of vulvovaginal candidiasis (RVVC) is common (4).  
66 Hematogenously disseminated candidiasis is a life-threatening condition of increasing incidence  
67 in recent decades (1). Despite the use of antifungal therapy, candidemia is associated with ~40%  
68 attributable mortality (5). Compounding these concerns is the alarming rise in emergence of  
69 *Candida* species resistant to antifungal drugs (6).

70  
71 *C. albicans* has multiple putative virulence capabilities including avid adherence to abiotic and  
72 host surfaces (7), the capacity to produce tissue-invading filaments (hyphae) (8), and the  
73 development of biofilms that promote immune evasion and impede efficacy of antifungal therapy  
74 (6). Targeting of these key virulence mechanisms provides opportunities for developing novel  
75 therapeutic interventions with minimal effects on the host mycobiome, and reduction in selection  
76 pressures that favor drug resistance (9).

77  
78 NDV-3 is a vaccine containing a His-tagged recombinant version of the *C. albicans* Als3 protein  
79 (Als3p) N-terminus formulated with alum. Expressed on *C. albicans* hyphae, Als3p promotes  
80 adhesion of the fungus to biotic and abiotic substrates, enables invasion of host cell tissues, and  
81 facilitates biofilm formation (10, 11). Deletion of the *Als3* gene significantly impairs these  
82 virulence traits of *C. albicans in vitro* (10, 11). Consistent with these themes, NDV-3 decreases  
83 disease severity caused by *Candida* species in mice (12-15).

84  
85 A Phase 1 clinical trial in healthy adults demonstrated safety and immunogenicity of the NDV-3  
86 vaccine as evidenced by robust antibody and T-cell immune responses (13). Furthermore, a single  
87 dose of NDV-3A (rAls3p without the His-tag and formulated with alum) administered  
88 intramuscularly was safe and induced strong antibody and T-cell immune responses in patients  
89 with RVVC in a recent exploratory Phase 1b/2a study. This immune response protected patients  
90 <40 years of age with a history of RVVC from recurrence over a twelve-month study period (16).  
91 Specifically, post-hoc exploratory analysis revealed a statistically significant increase in the  
92 percent of the symptoms-free patients at twelve months post vaccination (42% vaccinated vs. 22%  
93 placebo;  $p=0.029$ ) and a doubling time to first symptomatic episode (210 days vaccinated vs. 105  
94 days placebo) for the subset for the patients <40 years of age ( $n=137$ ).

95  
96 The objective of the current study is to investigate the role of Als3p antibodies induced by NDV-  
97 3A as biomarkers of vaccine efficacy by quantitative and qualitative analysis of antibody titers and  
98 by evaluating the effect of these antibodies on *C. albicans* virulence traits.

## 101 MATERIALS AND METHODS

102

### 103 Serum Samples

104 All sera used in this study were prepared from blood collected from NDV-3A or placebo recipients  
105 in a Phase 1b/2a study in women with RVVC (ClinicalTrials.gov access number, NCT01926028)  
106 (16) using previously described methods (13) and were stored at -80°C until analyzed. Sera were  
107 obtained from 64 of 66 NDV3-A recipients and 53 of 60 placebo recipients using appropriate  
108 collection, processing and storage practices. In the NDV3-A group, 27 patients had no recurrence  
109 of VVC during the 12-month follow-up period and were classified as “non-recurrent” (NR), while  
110 37 patients had one or more recurrences of VVC and were designated “recurrent” (R). For the  
111 placebo group, only 7 patients were classified as NR, while the rest were classified as R. Because  
112 of the low number of NR patients in the placebo arm all comparisons among NR and R patients  
113 were confined to NDV-3A vaccinated subjects. For the *in vitro* studies, matched sera from pre-  
114 immune (day 0) and post-vaccination (day 14 or 28) patients or placebo control were compared.

115

### 116 *Candida* Strain

117 *C. albicans* SC5314 is a well characterized strain, and was the source of the N-terminus of Als3  
118 used to develop the NDV-3A vaccine (17). Routinely, the organism was cultured overnight in  
119 yeast peptone dextrose (YPD) broth (Difco) at 30°C with shaking prior to use for *in vitro* assays.  
120 To induce germination, *C. albicans* blastospores ( $5 \times 10^6$ ) were grown in RPMI 1640 with L-  
121 glutamine (Gibco BRL) for 1 h at 37°C. For *in vivo* studies, *C. albicans* was serially passaged  
122 overnight 3 times in YPD before challenge in mice. In all studies, *C. albicans* cells were washed  
123 twice with endotoxin-free Dulbecco’s PBS, suspended in PBS or yeast nitrogen base (YNB, Difco)  
124 and counted with a hemocytometer to prepare the final inoculum.

125

### 126 Analysis of Sera Components

127 Als3p antibody titers in sera were measured using an ELISA assay as previously described (13).  
128 To inactivate complement, aliquots of patient sera were independently heated at 55°C for 1 h,  
129 added to wells containing *C. albicans* in Yeast Nitrogen Base (YNB) medium, and incubated for  
130 24 h at 37°C to permit biofilm development. To adsorb anti-*C. albicans* antibodies, the sera were  
131 incubated with *C. albicans* germ tubes for 1 h with gentle shaking at room temperature. The  
132 mixture was centrifuged at 21,000 *g* prior to using the cell-free supernatant in the biofilm assay.  
133 The presence and/or extent of removal of anti-Als3 antibodies (total IgG, IgG1 and/or IgG2) was  
134 measured by ELISA (18).

135

### 136 PBMC Analysis

137

138 Peripheral blood mononuclear cells (PBMC) were collected from vaccinees as previously  
139 described (13). PBMCs were evaluated by ELISpot analysis to determine the portion of cells that  
140 could be stimulated to produce interferon (IFN)- $\gamma$  and IL-17A. Results are expressed in spots  
141 forming units (SFU) per  $10^6$  cells.

142

### 143 Adhesion and Biofilm Assays

144 Adhesion and biofilm formation were measured in 96-well polystyrene microtiter plates as  
145 previously described (19). Briefly, a 95  $\mu$ L of *C. albicans* blastospores ( $2 \times 10^5$  cells/ml in YNB  
146 medium) was added to wells containing 5  $\mu$ L of patient serum (5% serum vol/vol), and incubated



147 at 37°C. Control wells had no serum. After 2 h, wells were washed twice with PBS and the extent  
148 of adhesion was quantified by XTT assay (490 nm) (20). In parallel, cells were grown in the  
149 presence of 5% serum for 24 h to promote biofilm formation. Biofilms were washed twice prior to  
150 examining by bright field microscopy and quantification by XTT assay (20). Formation of biofilm  
151 on the catheter material silicone elastomer (SE) was also assessed (19). Briefly, circular SE pieces  
152 were pre-incubated with fetal bovine serum overnight at 25°C, washed twice and then introduced  
153 into the wells. The biofilm assay was conducted as above, in the presence or absence of patient  
154 sera.

155

### 156 **Invasion Assay**

157 The human Ect1/E6E7 vaginal epithelial cell line was maintained in keratinocyte serum-free  
158 medium (Gibco) supplemented with bovine pituitary extract, epidermal growth factor,  
159 penicillin/streptomycin and passaged every 3–4 days as previously described (21). To study the  
160 effect of patient sera on *C. albicans* invasion, fibronectin-coated plastic coverslips were placed in  
161 a 24-well plate and the cells allowed to adhere overnight. After two washes, *C. albicans* cells were  
162 added to wells (fungus:host cell ratio of 5:1) for 12 h in the presence or absence of 5% patient  
163 serum. Non-adherent *C. albicans* was washed away, and the coverslips were stained with  
164 Concanavalin A (ConA) for 30 min at 37°C. The extent of epithelial cell invasion was visualized  
165 by differential staining using a confocal scanning laser microscope (Leica SP2) by overlaying the  
166 bright field image with a 594 nm excitation filter (red laser) for ConA. The non-invading yeast  
167 were stained, while the invading cells were unstained. The ability of *C. albicans* to invade the  
168 epithelium was expressed as % Invasion defined as: number of *C. albicans* cells invaded into the  
169 epithelium (i.e. unstained hyphae)/total number of *C. albicans* cells in a single bright field (stained  
170 + unstained cells) \*100. At least 20 field per slide were blindly scored and presented as mean %  
171 invasion.

172

### 173 **Neutrophil Killing Assay**

174 After obtaining IRB approved consent (LA Biomed protocol # 11672-07), neutrophils were  
175 isolated from blood collected from non-vaccinated human volunteers using endotoxin-free Ficoll-  
176 Paque Plus reagent (Amersham Biosciences) (12). Neutrophils were incubated with *C. albicans*  
177 germ-tubes containing YNB with 5% serum at 37°C without shaking (neutrophil:fungus ratio, 5:1).  
178 Controls contained *C. albicans* without neutrophils. After 90 min, the mixtures were sonicated to  
179 disrupt neutrophils and the surviving fungi quantitatively cultured. The percentage of  
180 opsonophagocytic killing (OPK) was calculated by dividing the number of CFU in the tubes  
181 containing neutrophils by the number of CFU in tubes without neutrophils.

182

### 183 **Statistical Analysis**

184 All *in vitro* studies were performed in triplicate at a minimum, with two biological replicates.  
185 Different groups were compared using the non-parametric Wilcoxon rank sum test for pairwise  
186 comparisons, and Mann Whitney test for comparison of unmatched groups. Data were analyzed in  
187 GraphPad Prism software (LaJolla, CA), and a p-value < 0.05 was considered statistically  
188 significant. We estimated how well the *in vitro* assays of adhesion, biofilm formation, neutrophil  
189 killing and IgG2 titers discriminated between sera of R and NR patients. We performed Receiver-  
190 operating characteristic (ROC) analysis on GraphPad Prism, which visualizes the sensitivity and  
191 specificity characteristics of a particular assay. The y-axis of the ROC graph represents sensitivity,  
192 or the true positive rate, i.e. the proportion correctly discriminated or predicted as by the assays.

193 The x-axis represents the component complement of specificity (100% - specificity). Area under  
194 the ROC curve (AUC) is a commonly used measure, where AUC of 1.0 represents a perfect curve  
195 fit, while an AUC of 0.5 represents random classification (22). Using ROC, we determined the cut  
196 point that maximized the sum of sensitivity and specificity for all the assays.

197  
198

In review

## 199 RESULTS

200

### 201 Antisera from R and NR Subjects Had Distinct Quantitative and Qualitative Antibody 202 Profiles

203 We analyzed the antibody titers of sera from R or NR patient in an attempt to understand the partial  
204 protection elicited by NDV-3A vaccine. We conducted an area under the curve (AUC) analysis of  
205 the total IgG titers of sera collected from NDV-3A vaccinated subjects over the 12-month period.  
206 AUC of total IgG titers from NR patients was significantly higher than those in sera from R patients  
207 during the early time points of collection (Day 0–90) (**Figure 1A**). Similarly, the geometric mean  
208 of IgG titers of the NR patients at 14 or 28 days post vaccination was approximately twice as high  
209 as that detected in R patients (Figure S1 in Supplemental Material). At later time points (Days 90-  
210 360), and despite the general drop in Ab titers for both patient populations, the difference in AUC  
211 titers of the NR vs. R patients was even greater (**Figure 1B**). Importantly, while the vast majority  
212 of placebo patients had first recurrence within the first 90 days post vaccination (median recurrence  
213 of 53 days), most of the vaccinated subjects had their first recurrence later than this (median  
214 recurrence of 94 days) (**Figure 1C**). Consistent with the Phase 1b/2a clinical trial (16), the  
215 enhanced time to recurrence was significant among vaccinees who are <40 years old ( $p=0.043$ ).  
216 Interestingly, the later recurrence corresponded with the decreased IgG levels beyond 90 days.

217

218 In parallel, the serum antibody profiles were evaluated for anti-Als3 IgG subclasses. The IgG1  
219 subclass comprised the predominant isotype in vaccinated NR and R sera (NR vs R IgG1 titer,  
220  $p=0.9$ , data not shown). Remarkably, the IgG2 titer in NR sera was much higher than in the R  
221 patient sera (**Figure 1D**), suggesting an isotype-specific enrichment in NR immune responses.  
222 Titers of IgG3 and IgG4 were not significantly different in sera of R vs. NR patients (data not  
223 shown). Also, we did not find any differences among IFN- $\gamma$  or IL-17 levels between R vs. NR  
224 patients, despite the enhanced level of these two cytokines upon vaccination with NDV-3A (Figure  
225 S2 in Supplemental Material). The quantitative and qualitative differences among serum  
226 antibodies from R vs. NR patients prompted us to test their effect on *C. albicans* virulence traits  
227 below.

228

### 229 Sera from NR Subjects Reduced *C. albicans* Adhesion to Plastic

230 Post-vaccination sera from NR subjects that received NDV-3A significantly reduced adhesion of  
231 *C. albicans* to plastic, compared to pre-vaccination sera from the same patients (**Figure 2A**). In  
232 contrast, post- vaccination sera obtained from R patients that received NDV-3A did not  
233 significantly alter *C. albicans* adhesion relative to pre-vaccination sera (**Figure 2B**). As expected,  
234 sera from patients who received the placebo did not influence *C. albicans* adhesion to plastic  
235 (**Figure 2C**). Sera from the NR-NDV-3A cohort was the only one that significantly reduced  
236 adhesion, compared to the other two groups (**Figure 2D**).

237

### 238 Sera from NR Patients Reduced *C. albicans* Biofilm Development

239 Post-vaccination sera from NR subjects who received NDV-3A reduced biofilm development as  
240 compared to their paired pre-vaccination sera (**Figure 3A**). This reduction was not observed when  
241 cells were incubated with sera from R subjects who received NDV-3A or sera from placebo  
242 recipients (**Figure 3B, C**). As in the adhesion assay, a significantly greater reduction in biofilm  
243 formation was observed in sera from NR versus R patients that received NDV-3A or placebo  
244 recipients (**Figure 3D**).

245 Bare-plastic is the gold-standard to measure biofilm formation (20). We wanted to confirm that  
246 sera samples that prevented biofilm formation on bare-plastic also prevent biofilm formation on  
247 SE used in manufacturing catheters. Thus, antisera of NR patients displaying the highest extent of  
248 biofilm inhibition were tested for their ability to impede biofilm formation on SE. These sera  
249 reduced *C. albicans* biofilm formation on the SE substrate to an extent similar to that observed in  
250 96 well-plates (Figure S3 in Supplemental Material).

251  
252 Consistent with reduction in biofilm formation, wells containing post-vaccination sera from NR  
253 patients also displayed reduced *C. albicans* adhesion by bright field microscopy, as depicted by  
254 reduced density of cells in the bottom of the wells (**Figure 4A**). This reduction in adhesion to  
255 plastic was accompanied by reduced hyphal elongation, but not germ tube induction (Figure S4 in  
256 Supplemental Material). In contrast, *C. albicans* growing in wells containing pre-vaccination sera  
257 from the same patient or commercially obtained pooled human serum (controls) displayed robust  
258 filamentation and biofilm formation (**Figure 4A**).

259  
260 **Sera from NR Patients Reduced *C. albicans* Invasion of Vaginal Epithelial Cells**  
261 Although sera preventing adhesion and biofilm formation were predominantly from the NR group,  
262 some R and placebo subject sera also impeded these *C. albicans* virulence functions. Therefore,  
263 sera from the three patients exhibiting the greatest inhibitory effect in each group were compared  
264 for pre- and post-vaccination impact on *C. albicans* capacity to invade vaginal epithelial cells  
265 (Figure S5 in Supplemental Material). Antisera from NR patients reduced *C. albicans* invasion of  
266 epithelial cells by ~53%, approximately two-fold higher than inhibition displayed by antisera of R  
267 patients (24%) (**Figure 4B**). The sera from placebo patients did not inhibit *Candida* invasion in  
268 this assay (**Figure 4B**).

269  
270 **The Inhibitory Function of Serum was Independent of Complement and Likely Associated**  
271 **with Antibodies**

272 To evaluate the possible role of complement, sera from 12 NR patients that received NDV-3A and  
273 had the highest decrease in biofilm development were heat-inactivated and then retested in the *C.*  
274 *albicans* biofilm assay. Inactivated sera retained biofilm inhibition equivalent to that of native sera  
275 (**Figure 5A**), indicating that complement does not play a significant role in the capacity of the sera  
276 to inhibit biofilm formation.

277  
278 To determine whether anti-*C. albicans* antibodies were the active constituent of serum, we  
279 incubated the pre- and post-sera with *C. albicans* germ tubes to adsorb antibodies against Als3.  
280 This process will adsorb antibodies targeting all surface proteins that are expressed on *C. albicans*  
281 germ tubes including those targeting Als3p. Indeed, ELISA plates coated with rAls3p for both day  
282 0 and post-vaccination confirmed that the absorption process significantly reduced the anti-Als3  
283 IgG titers in the samples (Figure S6 in Supplemental Material). Next, these sera were used in *C.*  
284 *albicans* biofilm assays as detailed above. Adsorption of antibodies from post-vaccination serum  
285 reduced their ability to inhibit biofilm formation (**Figure 5B**).

286  
287 **Sera from NR Patients Enhanced Neutrophil-Mediated Killing of *C. albicans***  
288 We questioned whether such functionally active sera influenced interactions of the fungus with  
289 neutrophils from unvaccinated human volunteers *ex vivo*. As displayed in **Figure 5C**, sera from  
290 NR patients enhanced neutrophil killing of fungal cells, compared to sera from R or P patients.

291 We also determined whether sera from NR patients that demonstrated the highest reduction in *C.*  
292 *albicans* adhesion to plastic also exhibited the highest level of neutrophil-mediated killing. We  
293 found a strong correlation between the ability of sera from NR patients to reduce adhesion and  
294 increased neutrophil-mediated killing ( $p < 0.05$  and  $R^2$  of 0.66). Further, overall larger numbers of  
295 NR patients (13 NR subjects) induced OPK and prevented adhesion than the R group (13 subjects)  
296 (Figure 5D and Figure S7 in Supplemental Material).

297

### 298 **ROC Analysis of the *in vitro* Assays Predicts Biomarkers of Vaccine Efficacy**

299 To statistically further validate the sensitivity and specificity of each of the *in vitro* assays, we  
300 performed an area under the ROC curve (cvAUROC) analysis for four assays comparing R to NR  
301 patient sera for patients that received NDV-3A. Our analysis of IgG2 predict that NR patients have  
302 higher IgG2 antibodies than 75% of the R patients (area under curve 0.75, p value 0.008). Further,  
303 our data reveal that an IgG2 antibody titer cutoff of above 1680 (100% sensitivity and >63%  
304 specificity) would predict the vaccinated patient to be protected. Similarly, a high  
305 sensitivity/specificity was obtained for the remaining three assays: adhesion (area under curve 0.7,  
306 p value= 0.007), biofilm reduction (area under curve 0.68, p value= 0.012), neutrophil killing (area  
307 under curve 0.75, p value= 0.029). These analyses support such correlations as potential  
308 biomarkers of vaccine efficacy.

309

310

## 311 DISCUSSION

312

313 In this study, we had the unique opportunity to compare humoral immune responses in patients  
314 who derived a measurable health benefit from the NDV-3A vaccine versus those who did not, and  
315 versus placebo patients. In addition, sera from R vs. NR subjects could be compared for their  
316 ability to impede key virulence functions of *C. albicans in vitro*. The study goals were to explore  
317 potential surrogate biomarkers of protection that might be useful in future studies of this and more  
318 serious *Candida* infections and to gain insight into the potential mechanism(s) contributing to  
319 protective efficacy of the vaccine. Our studies focused on determining the impact of serum  
320 antibodies on selected putative virulence factors of *C. albicans* for three reasons: 1. The NDV-3  
321 vaccine (based on *C. albicans* Als3 antigen with 6X His tag) induced high antibody titers (13); 2.  
322 High antibody titers predict NDV-3 vaccine efficacy in mice (23); and 3. Antibodies, including  
323 those targeting Hyr1p (24, 25), Sap2 (26), and *Candida* cell wall glycopeptides (27, 28), protect  
324 against experimental candidiasis. We focused also on *Candida* adhesion and invasion of vaginal  
325 epithelial cells, as well as biofilm formation, since Als3p is a known mediator of these putative  
326 virulence functions (10, 11, 29).

327

328 NR patients maintained a high antibody median titer (AUC) of  $\geq 25,000$ , while R patients had a  
329 median AUC titer of 10,000 after 90 days post vaccination. This temporal waning of antibody  
330 response coincided with the increased frequency to first relapse in R patients. The decrease in  
331 antibody titer raises the possibility that R patients may benefit from a booster dose following  
332 priming with the vaccine. There was also a significant increase in IgG2 subclass titers in NR  
333 patients that received NDV-3A as compared to the R patients that received the vaccine, suggesting  
334 that this IgG subclass may be a surrogate marker of protection post-vaccination. Human IgG2 and  
335 IgG4, but not IgG1 or IgG3, have been reported to protect mice against *Cryptococcus*  
336 *neoformans* infection (30), most likely by enhancing the fungicidal activity of macrophages (31).  
337 Based on our current data, it is possible that the IgG2 subclass antibody component could impair  
338 *C. albicans* interactions with host tissues, and contribute to neutrophil activation leading to  
339 enhanced *C. albicans* killing by NR antisera. However, an important alternative hypothesis is also  
340 of interest, that IgG2 and IgG4 antibody are surrogates for non-inflammatory skewing of immune  
341 responses, biasing against symptoms of relapse.

342

343 Sera from NR patients that received NDV-3A significantly reduced *C. albicans* adherence to  
344 plastic and SE, and impeded invasion of vaginal epithelial cells by *C. albicans* hyphae more than  
345 antisera obtained from R patients that received NDV-3A or those from placebo. Biofilm formation  
346 is a function of the ability of *C. albicans* to adhere to abiotic surfaces. Thus, it was not unexpected  
347 that higher levels of anti-Als3 antibodies, as seen in antisera from NR patients but not R patients,  
348 would also significantly reduced *Candida* biofilm formation. As determined from antibody  
349 adsorption and complement inactivation studies, such abrogation of these *C. albicans* virulence  
350 functions was due, at least in part, to anti-Als3p antibodies and did not require complement  
351 fixation.

352

353 Our group previously demonstrated that NDV-3 protects mice from VVC by a mechanism that  
354 involves priming of both B cell- and T cell-mediated adaptive immune responses (12).  
355 Specifically, anti-Als3p antibodies enhanced the *ex vivo* killing of *C. albicans* by neutrophils  
356 primed with IFN- $\gamma$  (12). Although in the current study we could not detect a correlation between

357 IgG titers of NR and R vaccinated subjects and their corresponding IFN- $\gamma$  levels, antisera from  
358 NR patients significantly enhanced the ability of human neutrophils to kill *C. albicans ex vivo* as  
359 compared to antisera from R patients or patients administered placebo. These results are  
360 concordant with the finding that RVVC is a disease in which a discordance of exacerbated  
361 neutrophil influx often occurs in the face of inefficiency in clearing the infection (32-34). We  
362 postulate that in NR women, the vaccine was able to induce an antibody response that; 1) protected  
363 against *C. albicans* adherence to and invasion of mucocutaneous barriers; 2) reduced the capability  
364 of the organism to form biofilm from which persistent infection occurs; 3) induced a coordinated  
365 phagocyte response that is more efficacious in clearing the infection; and/or 4) modulated  
366 profuse inflammatory responses of the host associated with relapse.

367  
368 The statistical robustness of the *in vitro* assays of IgG2, adhesion, biofilm formation and neutrophil  
369 killing which were validated in our ROC analyses, revealed that any of these tests could be used  
370 as biomarkers of vaccine efficacy. While the latter three assays are likely too cumbersome to  
371 support larger clinical trials, an ELISA measuring IgG2 in the sera of vaccinated patients would  
372 be a simple yet robust method to predict the protective efficacy of a vaccine in a human clinical  
373 study like the current one, or future studies on disseminated candidiasis.

374  
375 Our forthcoming studies are planned to precisely define the roles of antibody isotypes, the impact  
376 of boosting, the combination of multiple antigen vaccines, and the influence of advanced adjuvants  
377 to further optimize vaccine and immunotherapeutic strategies targeting *Candida* species.  
378

## 379 **FUNDING**

380 This work was supported by NIH grant R01 AI063382 to JE, DOD grant W81XWH-11-1-0686  
381 to JH, American Heart Association 16SDG30830012 to PU and by NovaDigm Therapeutics.

382

383

## 384 **AUTHORS CONTRIBUTIONS**

385

386 PU designed, performed, supervised the project and wrote the manuscript. SS performed  
387 experiments, designed the ROC, analyzed the data and revised the manuscript. AA performed the  
388 experiments and analyzed the data, CS provided materials and revised the manuscript. JH,  
389 provided materials and revised the manuscript, MY revised the manuscript, SF contributed to the  
390 study design and revised the manuscript. JE contributed to the study design and revised the  
391 manuscript. AI designed and supervised the project and wrote the manuscript.

392

## 393 **CONFLICT OF INTEREST**

394

395 CS and JH are employees and shareholders of NovaDigm Therapeutics. MY, SF, JE, and AI are  
396 founders and shareholders of NovaDigm Therapeutics. All other co-authors have no formal  
397 association with NovaDigm.

398

## 399 **ETHICS STATEMENTS**

400 This study was carried out in accordance with the recommendations of National Institutes of  
401 Health guidelines for human subject policies and ethical guidance and regulations with written  
402 informed consent from all subjects. All subjects gave written informed consent in accordance  
403 with the Declaration of Helsinki. The protocol was approved by the 'Los Angeles Biomedical  
404 Research Institute IRB'.

405

406

## 407 **REFERENCES**

408

- 409 1. Brown GD, Denning DW, Gow NA, Levitz SM, Netea MG, and White TC. Hidden killers:  
410 human fungal infections. *Sci Transl Med.* 2012;4(165):165rv13.
- 411 2. Sobel JD. Vaginal infections in adult women. *Med Clin North Am.* 1990;74(6):1573-602.
- 412 3. Sobel JD, Faro S, Force RW, Foxman B, Ledger WJ, Nyirjesy PR, Reed BD, and Summers  
413 PR. Vulvovaginal candidiasis: epidemiologic, diagnostic, and therapeutic considerations.  
414 *Am J Obstet Gynecol.* 1998;178(2):203-11.
- 415 4. Blostein F, Levin-Sparenberg E, Wagner J, and Foxman B. Recurrent vulvovaginal  
416 candidiasis. *Ann Epidemiol.* 2017.
- 417 5. Wenzel RP. Nosocomial candidemia: risk factors and attributable mortality. *Clin Infect*  
418 *Dis.* 1995;20(6):1531-4.



- 419 6. Ramage G, Rajendran R, Sherry L, and Williams C. Fungal biofilm resistance. *Int J*  
420 *Microbiol.* 2012;2012(528521).
- 421 7. Tsui C, Kong EF, and Jabra-Rizk MA. Pathogenesis of *Candida albicans* biofilm. *Pathog*  
422 *Dis.* 2016;74(4):ftw018.
- 423 8. Williams DW, Jordan RP, Wei XQ, Alves CT, Wise MP, Wilson MJ, and Lewis MA.  
424 Interactions of *Candida albicans* with host epithelial surfaces. *J Oral Microbiol.* 2013;5(
- 425 9. Pierce CG, Chaturvedi AK, Lazzell AL, Powell AT, Saville SP, McHardy SF, and Lopez-  
426 Ribot JL. A Novel Small Molecule Inhibitor of *Candida albicans* Biofilm Formation,  
427 Filamentation and Virulence with Low Potential for the Development of Resistance. *NPJ*  
428 *Biofilms Microbiomes.* 2015;1(
- 429 10. Phan QT, Myers CL, Fu Y, Sheppard DC, Yeaman MR, Welch WH, Ibrahim AS, Edwards  
430 JE, Jr., and Filler SG. Als3 is a *Candida albicans* invasin that binds to cadherins and induces  
431 endocytosis by host cells. *PLoS Biol.* 2007;5(3):e64.
- 432 11. Zhao X, Daniels KJ, Oh SH, Green CB, Yeater KM, Soll DR, and Hoyer LL. *Candida*  
433 *albicans* Als3p is required for wild-type biofilm formation on silicone elastomer surfaces.  
434 *Microbiology.* 2006;152(Pt 8):2287-99.
- 435 12. Ibrahim AS, Luo G, Gebremariam T, Lee H, Schmidt CS, Hennessey JP, Jr., French SW,  
436 Yeaman MR, Filler SG, and Edwards JE, Jr. NDV-3 protects mice from vulvovaginal  
437 candidiasis through T- and B-cell immune response. *Vaccine.* 2013;31(47):5549-56.
- 438 13. Schmidt CS, White CJ, Ibrahim AS, Filler SG, Fu Y, Yeaman MR, Edwards JE, Jr., and  
439 Hennessey JP, Jr. NDV-3, a recombinant alum-adsjuvanted vaccine for *Candida* and  
440 *Staphylococcus aureus*, is safe and immunogenic in healthy adults. *Vaccine.*  
441 2012;30(52):7594-600.
- 442 14. Lin L, Ibrahim AS, Avanesian V, Edwards JE, Jr., Fu Y, Baquir B, Taub R, and Spellberg  
443 B. Considerable differences in vaccine immunogenicities and efficacies related to the  
444 diluent used for aluminum hydroxide adjuvant. *Clin Vaccine Immunol.* 2008;15(3):582-4.
- 445 15. Spellberg B, Ibrahim AS, Lin L, Avanesian V, Fu Y, Lipke P, Otoo H, Ho T, and Edwards  
446 JE, Jr. Antibody titer threshold predicts anti-candidal vaccine efficacy even though the  
447 mechanism of protection is induction of cell-mediated immunity. *J Infect Dis.*  
448 2008;197(7):967-71.
- 449 16. Edwards JJE, Schwartz MS, Schmidt CS, Sobel J, Nyirjesy P, Schodel F, Marchus E,  
450 Lizakowski M, DeMontigny EA, Hoeg J, et al. A Fungal Immunotherapeutic Vaccine  
451 (NDV-3A) for Treatment of Recurrent Vulvovaginal Candidiasis; A Phase 2 Randomized,  
452 Double-blind, Placebo-controlled Trial. *Clinical Infectious Diseases.* 2018.  
453 [doi.org/10.1093/cid/ciy185](https://doi.org/10.1093/cid/ciy185)
- 454 17. Spellberg BJ, Ibrahim AS, Avanesian V, Fu Y, Myers C, Phan QT, Filler SG, Yeaman MR,  
455 and Edwards JE, Jr. Efficacy of the anti-*Candida* rAls3p-N or rAls1p-N vaccines against  
456 disseminated and mucosal candidiasis. *J Infect Dis.* 2006;194(2):256-60.
- 457 18. Ibrahim AS, Spellberg BJ, Avanesian V, Fu Y, and Edwards JE, Jr. The anti-*Candida*  
458 vaccine based on the recombinant N-terminal domain of Als1p is broadly active against  
459 disseminated candidiasis. *Infect Immun.* 2006;74(5):3039-41.
- 460 19. Uppuluri P, Chaturvedi AK, Srinivasan A, Banerjee M, Ramasubramaniam AK, Kohler  
461 JR, Kadosh D, and Lopez-Ribot JL. Dispersion as an important step in the *Candida albicans*  
462 biofilm developmental cycle. *PLoS Pathog.* 2010;6(3):e1000828.
- 463 20. Pierce CG, Uppuluri P, Tristan AR, Wormley FL, Jr., Mowat E, Ramage G, and Lopez-  
464 Ribot JL. A simple and reproducible 96-well plate-based method for the formation of

- 465 fungal biofilms and its application to antifungal susceptibility testing. *Nat Protoc.*  
466 2008;3(9):1494-500.
- 467 21. Steele C, and Fidel PL, Jr. Cytokine and chemokine production by human oral and vaginal  
468 epithelial cells in response to *Candida albicans*. *Infect Immun.* 2002;70(2):577-83.
- 469 22. Hanley JA, and McNeil BJ. The meaning and use of the area under a receiver operating  
470 characteristic (ROC) curve. *Radiology.* 1982;143(1):29-36.
- 471 23. Spellberg B, Ibrahim AS, Lin L, Avanesian V, Fu Y, Lipke P, Otoo H, Ho T, and Edwards  
472 JE. Antibody Titer Threshold Predicts Anti-Candidal Vaccine Efficacy Even though the  
473 Mechanism of Protection Is Induction of Cell-Mediated Immunity. *The Journal of*  
474 *infectious diseases.* 2008;197(7):967-71.
- 475 24. Luo G, Ibrahim AS, French SW, Edwards JE, Jr., and Fu Y. Active and passive  
476 immunization with rHyr1p-N protects mice against hematogenously disseminated  
477 candidiasis. *PLoS One.* 2011;6(10):e25909.
- 478 25. Luo G, Ibrahim AS, Spellberg B, Nobile CJ, Mitchell AP, and Fu Y. *Candida albicans*  
479 Hyr1p confers resistance to neutrophil killing and is a potential vaccine target. *J Infect Dis.*  
480 2010;201(11):1718-28.
- 481 26. Vilanova M, Teixeira L, Caramalho I, Torrado E, Marques A, Madureira P, Ribeiro A,  
482 Ferreira P, Gama M, and Demengeot J. Protection against systemic candidiasis in mice  
483 immunized with secreted aspartic proteinase 2. *Immunology.* 2004;111(3):334-42.
- 484 27. Xin H, Cartmell J, Bailey JJ, Dziadek S, Bundle DR, and Cutler JE. Self-adjuvanting  
485 glycopeptide conjugate vaccine against disseminated candidiasis. *PLoS One.*  
486 2012;7(4):e35106.
- 487 28. Xin H, and Cutler JE. Vaccine and monoclonal antibody that enhance mouse resistance to  
488 candidiasis. *Clin Vaccine Immunol.* 2011;18(10):1656-67.
- 489 29. Nobile CJ, Andes DR, Nett JE, Smith FJ, Yue F, Phan QT, Edwards JE, Filler SG, and  
490 Mitchell AP. Critical role of Bcr1-dependent adhesins in *C. albicans* biofilm formation in  
491 vitro and in vivo. *PLoS Pathog.* 2006;2(7):e63.
- 492 30. Beenhouwer DO, Yoo EM, Lai CW, Rocha MA, and Morrison SL. Human  
493 immunoglobulin G2 (IgG2) and IgG4, but not IgG1 or IgG3, protect mice against  
494 *Cryptococcus neoformans* infection. *Infect Immun.* 2007;75(3):1424-35.
- 495 31. Subramaniam KS, Datta K, Marks MS, and Pirofski LA. Improved survival of mice  
496 deficient in secretory immunoglobulin M following systemic infection with *Cryptococcus*  
497 *neoformans*. *Infect Immun.* 2010;78(1):441-52.
- 498 32. Fidel PL, Jr., Barousse M, Espinosa T, Ficarra M, Sturtevant J, Martin DH, Quayle AJ, and  
499 Dunlap K. An intravaginal live *Candida* challenge in humans leads to new hypotheses for  
500 the immunopathogenesis of vulvovaginal candidiasis. *Infect Immun.* 2004;72(5):2939-46.
- 501 33. Peters BM, Yano J, Noverr MC, and Fidel PL, Jr. *Candida* vaginitis: when opportunism  
502 knocks, the host responds. *PLoS Pathog.* 2014;10(4):e1003965.
- 503 34. Yano J, Noverr MC, and Fidel PL, Jr. Vaginal Heparan Sulfate Linked to Neutrophil  
504 Dysfunction in the Acute Inflammatory Response Associated with Experimental  
505 Vulvovaginal Candidiasis. *MBio.* 2017;8(2).

508 **Figure legends**

509 **Figure 1. Analysis of the antibody response in vaccinated patients.** Mean area under the curve (AUC)  
510 of the total IgG titers over time (0-90 and 90-360 days) for each patient, in the NR and R NDV-3A-  
511 vaccinated subjects was plotted. In the first 3 months post-vaccination, AUC of NR patients was  
512 significantly higher ( $p=0.046$ ) than that of R patients (A). In months 3 – 12, this difference in AUC was  
513 also significant ( $p=0.022$ ) (B). The decrease in AUC of the IgG titers in R patient sera in the later months  
514 corresponded with the increase in recurrent episodes of VVC during this period (C). Finally, significantly  
515 more number of NR patients displayed IgG2 antibodies in their sera, also mean (geometric) IgG2 antibody  
516 titer was higher in NR patients, compared to R patients ( $p=0.003$ ) (D). Each dot in A, B, and D represents  
517 antibody titers in each analyzed serum samples from the indicated individual patients. Each dot in C  
518 represent a first relapse in infection as a function of time post vaccination. Data in A, B, and D are presented  
519 as geometric mean with 95% confidence interval.

520  
521 **Figure 2. *In vitro* assessment of *Candida albicans* adherence to plastic in presence of patient sera.** Post-  
522 vaccination sera from 27 non-recurrent NR patients significantly ( $p=0.0005$ ) reduced *C. albicans* adhesion  
523 when compared to their respective pre-vaccination sera (A). There was no difference in the extent of  
524 adhesion between pre and post vaccination sera from 37 recurrent (R) patients ( $p=0.33$ ) (B), or 53 placebo  
525 (P) patients ( $p=0.067$ ) (C). Percent inhibition of *C. albicans* adhesion to plastic was significantly higher in  
526 post-vaccination sera of NR patients versus that of R or P patients (D). Data in D are presented as median  
527  $\pm$  interquartile range. Each dot represents alteration in *C. albicans* adhesion due to an individual patient  
528 sample.

529  
530 **Figure 3. *In vitro* assessment of *Candida albicans* biofilm formation in presence of patient sera.** Post-  
531 vaccination sera from 27 non-recurrent (NR) patients significantly ( $p=0.003$ ) reduced *C. albicans* biofilm  
532 formation on 96-well microtiter plates, when compared to their respective pre-vaccination sera (A). There  
533 was no difference in the extent of biofilm growth between pre- and post-vaccination sera from 37 recurrent  
534 (R) patients ( $p=0.97$ ) (B), or 53 placebo (P) patients ( $p=0.33$ ) (C). The percent inhibition of *C. albicans*  
535 biofilms to plastic was significantly higher in post-vaccination sera of NR patients versus that from R or P  
536 patients (D). Data in D are presented as median  $\pm$  interquartile range. Each dot represents alteration in *C.*  
537 *albicans* biofilm formation due to an individual patient sample. The open data points in D represent 6  
538 placebo and 6 NDV3-A vaccinated patients (3 R and 3 NR) whose sera showed the highest reduction in  
539 biofilm formation, and were chosen for the vaginal epithelial cell invasion assay presented in Figure 3B.

540  
541  
542 **Figure 4. *In vitro* assessment of *Candida albicans* filamentation, and invasion of vaginal epithelial cells**  
543 **in presence of patient sera.** Representative micrographs (from 6 different samples in each arm) showing  
544 that post-vaccination sera from NR patients that abrogated biofilm formation displayed short and wavy  
545 hyphae, compared to the normal robust hyphae in the biofilms formed in pre-vaccination serum, or the  
546 control commercial pooled human serum (A). Six samples from placebo or NDV-3A vaccinated patients  
547 (3 R and 3 NR) were selected from Figure 2D (open symbols) for analysis in invasion of vaginal epithelial  
548 cells. Post vaccination sera from NR patients inhibited invasion of vaginal epithelial cells two- fold more  
549 than R patient or P patient sera (B). \*\* $P < 0.01$  for post- vs. pre-vaccination sera from R patients. \* $P < 0.05$   
550 for post-vaccination sera vs. pre-vaccination sera from NR and vs. post-vaccination sera from R or placebo  
551 patients. Data in B are presented as mean  $\pm$  SD.

552  
553 **Figure 5. Assessment of the role of antibodies in affecting virulence, and evaluation of OPK of *C.***  
554 ***albicans* germ tubes in the presence of patient sera.** Heat treatment of post-vaccination sera from NR  
555 patients does not significantly reduce its biofilm-inhibitory activity, compared to paired untreated sera (A).  
556 Adsorption of antibodies in post-vaccination sera from NR patients with *C. albicans* germ tubes  
557 significantly ( $p=0.03$ ) abolishes the biofilm inhibitory activity of the sera, when compared to paired

558 adsorbed pre-vaccination sera. Only post-vaccination sera from NR patients significantly ( $p=0.03$ ) enhance  
559 OPK and killing of *C. albicans* germ tubes by human neutrophils, compared to post-vaccination sera from  
560 R or P patients (C). A comparison between percent increase in OPK activity and percent reduction in  
561 adhesion, in post-vaccination sera from NR and R patients, resulted in significant correlation within the  
562 respective subject sera (D). Each open circle represents individual NR sera, which displayed both an overall  
563 greater reduction in adhesion and increase in neutrophil killing. Solid circles denote the individual R  
564 patients that compared to the NR patients, show a smaller % decrease in adhesion as well as neutrophil  
565 killing. Negative values on the graph represent % increase in adhesion or % decrease in neutrophil killing.  
566

567 **Figure 6. ROC analysis of the *in vitro* assays.** An ROC analyses for four *in vitro* studies was performed  
568 on GraphPad Prism software, where a graph was generated of 100% - (minus) Specificity% versus  
569 Sensitivity % for each of the assays: IgG2 titers (A), adhesion (B), biofilm formation (C) and neutrophil  
570 killing (D). For each graph, an Area Under the Curve (Area), standard error of the AUC under the ROC  
571 curve, as well as the 95% confidence interval is reported. A p-value of  $<0.05$  in each of the ROC curves  
572 concludes that the results are significant, and robust.  
573

In review

Figure 1.TIF

bioRxiv preprint doi: <https://doi.org/10.1101/324483>; this version posted May 17, 2018. The copyright holder for this preprint (which was not certified by peer review) is the author/funder, who has granted bioRxiv a license to display the preprint in perpetuity. It is made available under aCC-BY-NC-ND 4.0 International license.

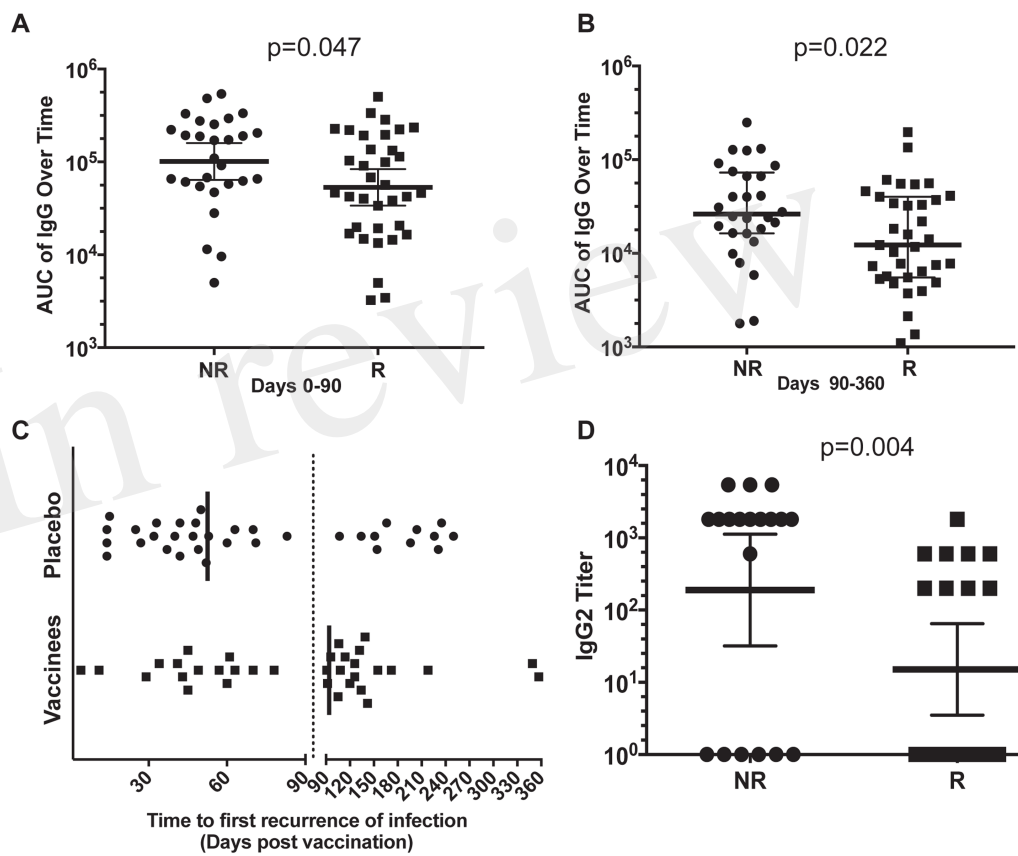

Figure 1

Figure 2.TIF

bioRxiv preprint doi: <https://doi.org/10.1101/324483>; this version posted May 17, 2018. The copyright holder for this preprint (which was not certified by peer review) is the author/funder, who has granted bioRxiv a license to display the preprint in perpetuity. It is made available under aCC-BY-NC-ND 4.0 International license.

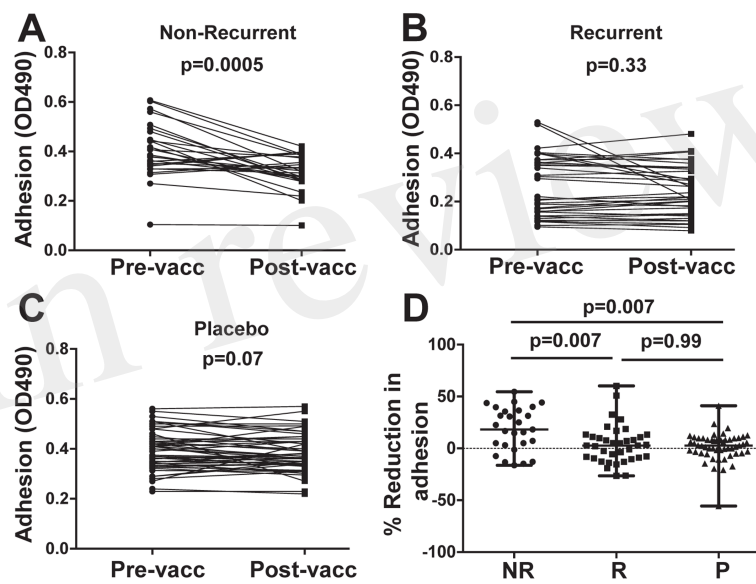

Figure 2

Figure 3.TIF

bioRxiv preprint doi: <https://doi.org/10.1101/324483>; this version posted May 17, 2018. The copyright holder for this preprint (which was not certified by peer review) is the author/funder, who has granted bioRxiv a license to display the preprint in perpetuity. It is made available under aCC-BY-NC-ND 4.0 International license.

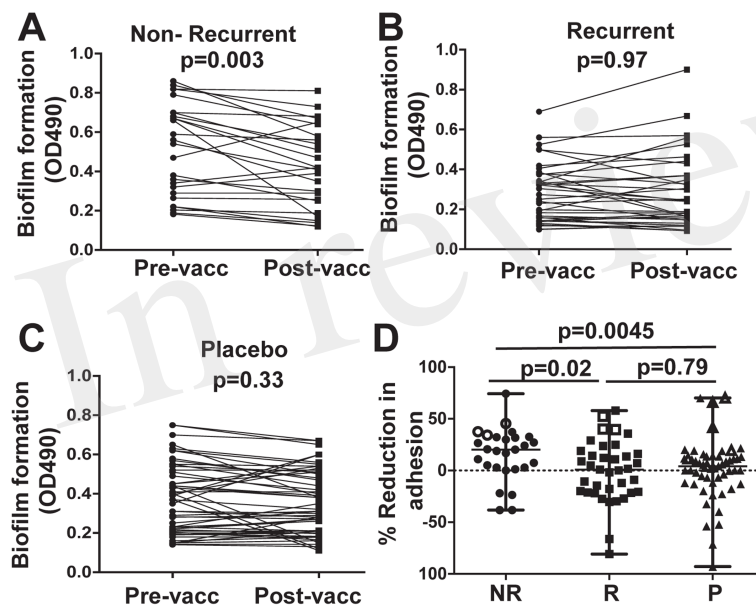

Figure 3

Figure 4.TIF

bioRxiv preprint doi: <https://doi.org/10.1101/324483>; this version posted May 17, 2018. The copyright holder for this preprint (which was not certified by peer review) is the author/funder, who has granted bioRxiv a license to display the preprint in perpetuity. It is made available under aCC-BY-NC-ND 4.0 International license.

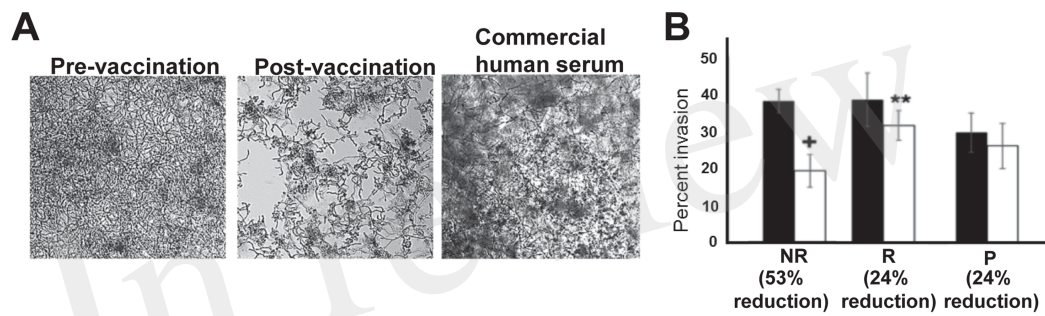

Figure 4



Figure 5.TIF

bioRxiv preprint doi: <https://doi.org/10.1101/324483>; this version posted May 17, 2018. The copyright holder for this preprint (which was not certified by peer review) is the author/funder, who has granted bioRxiv a license to display the preprint in perpetuity. It is made available under aCC-BY-NC-ND 4.0 International license.

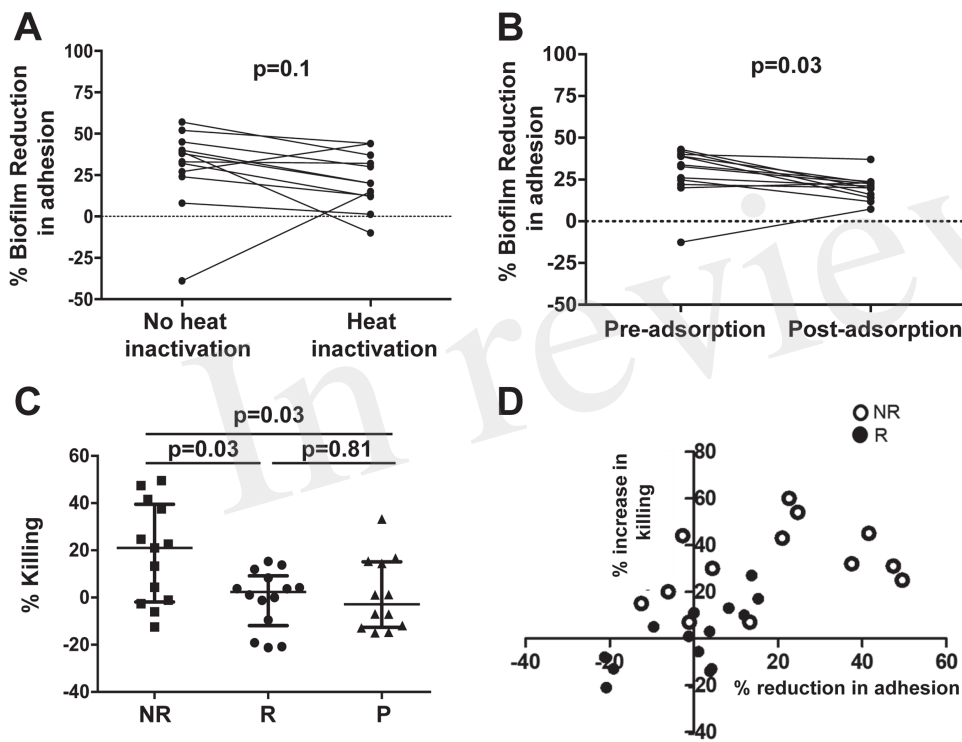

Figure 5

Figure 6.TIF

bioRxiv preprint doi: <https://doi.org/10.1101/324483>; this version posted May 17, 2018. The copyright holder for this preprint (which was not certified by peer review) is the author/funder, who has granted bioRxiv a license to display the preprint in perpetuity. It is made available under aCC-BY-NC-ND 4.0 International license.

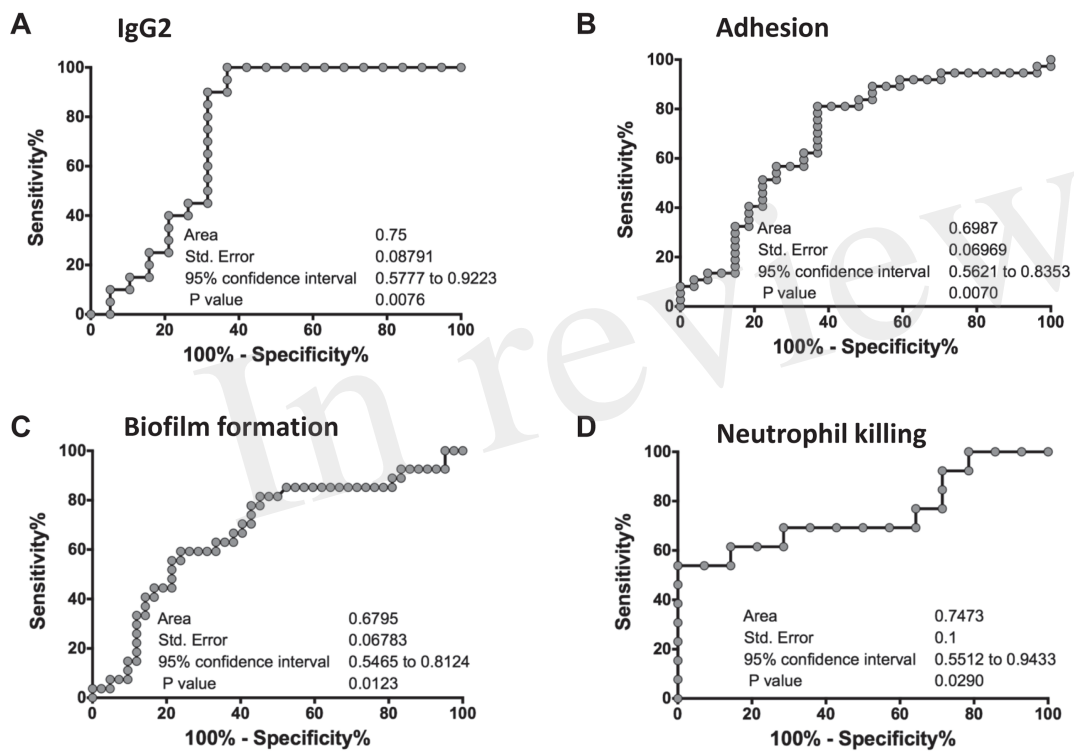

Figure 6
